# Supplementary material for: Attitudes of East Tennessee residents towards general and pertussis vaccination: a qualitative study
Source: Springer Nature journal article supplement (doi:10.1186/s12889-021-10465-w), 2021-03-05
Supplement: MOESM1 [file 18935136]

Date: \_\_\_\_\_  
Participant Number \_\_\_\_\_

## Demographic Questionnaire

Age: \_\_\_\_\_

Gender (please circle): Male          Female          Transgender

Another Gender Identity (fill in blank if desired): \_\_\_\_\_

Prefer not to answer

Race/Ethnicity (Circle all that apply): White (Non-Hispanic)    Hispanic    Black    Other: \_\_\_\_\_

Education (please circle):

Some High School  
High School Degree  
Some College  
College Degree  
Graduate/Professional Degree

Average Annual Income (please circle):

|               |               |
|---------------|---------------|
| <10,000       | 10,001-25,000 |
| 25,001-40,000 | 40,001-60,000 |
| 60,001-75,000 | >75,000       |

Do you have health insurance? (please circle): Yes    No

If yes: Private          Government

Have you ever received a vaccine? (please circle): Yes    No

If yes, Have you gotten a tetanus shot in the last 10 years? (please circle): Yes    No

If yes, do you know if it included protection against pertussis/whooping cough (Tdap)? (please circle):

Yes    No    Don't Know

Do you have children? (please circle): Yes    No

If yes, have they ever received a vaccine? Yes    No

If yes, have they received their pertussis/whooping cough (DTaP) series?: Yes    No
